# Supplementary material for: Nanoliposome-Loaded Phenolics from Nasturtium officinale Improves Health Parameters in a Colorectal Cancer Mouse Model
Source: MDPI journal article supplement (doi:10.3390/ani12243492), 2022-12-10
Supplement: s1 [file s1]

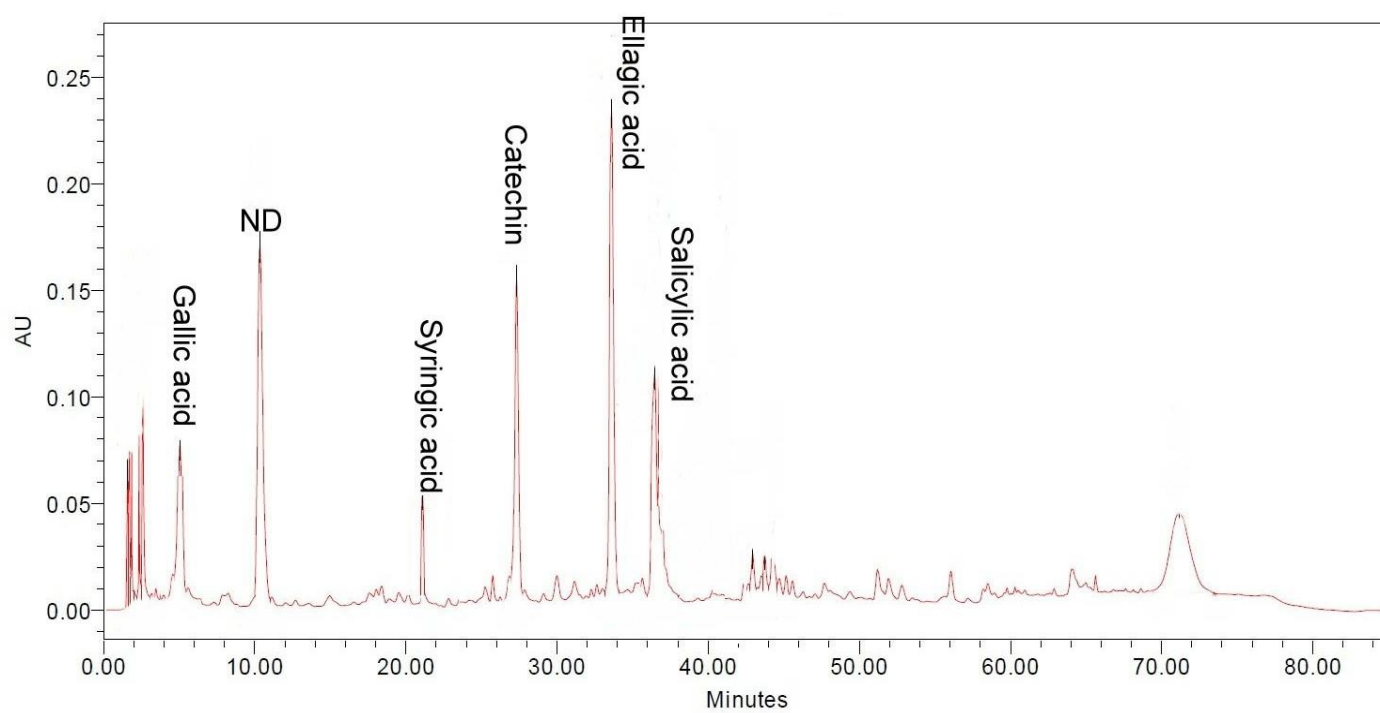

**Figure S1.** The RP-HPLC spectra of different bioactive compounds in nanoliposome-encapsulated phenolic rich fraction of *Nasturtium officinale* (ND = Not detected).
